# Supplementary material for: Loneliness and social isolation as risk factors for coronary heart disease and stroke: systematic review and meta-analysis of longitudinal observational studies
Source: PubMed Central journal article supplement (PMC4941172; doi:10.1136/heartjnl-2015-308790), 2016-04-18
Supplement: heartjnl-2015-308790supp_appendix1.pdf [file heartjnl-2015-308790supp_appendix1.pdf]

## SUPPLEMENTAL MATERIAL

### Appendix 1 MEDLINE search strategy

**Database: Ovid MEDLINE(R) In-Process & Other Non-Indexed Citations and Ovid MEDLINE(R) <1946 to Present>**

Searched online 10/06/14

Strategy saved as: Loneliness\_Medline

Search Strategy:

- 
- 1 loneliness/ (2206)
  - 2 social isolation/ (10940)
  - 3 social alienation/ (1309)
  - 4 social support/ (51329)
  - 5 community networks/ (5430)
  - 6 social distance/ (1444)
  - 7 interpersonal relations/ (55367)
  - 8 Friends/ (2680)
  - 9 psychosocial deprivation/ (1817)
  - 10 Social Participation/ (545)
  - 11 (lonely or loneliness or solitude).ti,ab. (3910)
  - 12 ((social\* or societ\* or perce\* or person\*) adj3 (isolation or isolated or alienation or alienated or relation\* or detachment or detached or contact or link or tie or ties or support\* or network\* or participation or activ\* or engage\* or connect\* or disconnect\* or cohesion or cohesive or embedded\* or vulnerab\* or interact\*)).ti. (19533)
  - 13 (social wellbeing or social health or social capital).ti. (1205)
  - 14 or/1-13 (134819)
  - 15 exp cohort studies/ (1353453)
  - 16 cohort\$.tw. (280225)
  - 17 controlled clinical trial.pt. (88473)
  - 18 epidemiologic methods/ (29786)
  - 19 exp case-control studies/ (662637)
  - 20 (case\$ and control\$).tw. (331312)
  - 21 or/15-20 (1913522)
  - 22 and/14,21 (15308)
