# Supplementary material for: Loneliness and social isolation as risk factors for coronary heart disease and stroke: systematic review and meta-analysis of longitudinal observational studies
Source: PubMed Central journal article supplement (PMC4941172; doi:10.1136/heartjnl-2015-308790), 2016-04-18
Supplement: heartjnl-2015-308790supp_appendix2.pdf [file heartjnl-2015-308790supp_appendix2.pdf]

## Appendix 2 Overview of studies included in our review

Studies are grouped according to the dimension of social relationships they investigated (loneliness, social isolation or a combination of both); the measure of social relationships used (e.g. studies using the Berkman-Syme Social Network Index are grouped together); and the datasets used (i.e. studies reporting data from the same dataset, e.g. the Established Populations for the Epidemiologic Studies of the Elderly Study, are grouped together).

| First author & year published               | Data source & country          | Data collection dates | Population group (number of participants)                                                                                 | Age of study subjects at baseline | Follow-up period - mean, median and/or range | Outcome measure                                                    | Number of events | Covariates adjusted for                                                                                                                             | Main results for our review                                                                                                                                             |
|---------------------------------------------|--------------------------------|-----------------------|---------------------------------------------------------------------------------------------------------------------------|-----------------------------------|----------------------------------------------|--------------------------------------------------------------------|------------------|-----------------------------------------------------------------------------------------------------------------------------------------------------|-------------------------------------------------------------------------------------------------------------------------------------------------------------------------|
| <b>Studies with a measure of loneliness</b> |                                |                       |                                                                                                                           |                                   |                                              |                                                                    |                  |                                                                                                                                                     |                                                                                                                                                                         |
| André-Petersson, 2006                       | Men Born in 1914 Study, Sweden | 1982-1983 to 1996     | Men born in 1914 and living in Malmö in 1982/3, who showed adaptive behaviour in a stressful situation (n=208)            | 67-68                             | Mean: 10.3 years                             | Myocardial infarction (MI), fatal or non-fatal; register based     | 43               | Prevalent CHD (previous experience of MI or angina pectoris), use of antihypertensive drugs, socio-economic status (SES), s-triglycerides           | Cox proportional hazards model. Comparing subjects with unsatisfactory (lonely) v. satisfactory social support (not lonely), Hazard ratio (HR): 1.19, 95% CI: 0.64-2.22 |
| Eaker, 1992                                 | Framingham Heart Study, USA    | 1965-1967 to 1987     | Female homemakers living in Framingham, Massachusetts in 1948 and completed a 300-item psychosocial questionnaire (n=353) | 45 to 64                          | Study length: 20 years                       | MI or coronary death, both sudden and not sudden; medical records. | 30               | Age, systolic blood pressure, ratio of serum total cholesterol to high-density lipoprotein cholesterol, diabetes, cigarettes, body mass index (BMI) | Cox proportional hazards model. Comparing lonely v. not lonely subjects, HR: 4.0, 95% CI: 1.8-9.2                                                                       |

|                |                                           |                   |                                                                                                                                                                      |                                 |                                                  |                                                                             |     |                                                                                                                                                                                                          |                                                                                                                                                                                                                                                                                                                                |
|----------------|-------------------------------------------|-------------------|----------------------------------------------------------------------------------------------------------------------------------------------------------------------|---------------------------------|--------------------------------------------------|-----------------------------------------------------------------------------|-----|----------------------------------------------------------------------------------------------------------------------------------------------------------------------------------------------------------|--------------------------------------------------------------------------------------------------------------------------------------------------------------------------------------------------------------------------------------------------------------------------------------------------------------------------------|
| Thurston, 2009 | National Health and Nutrition Survey, USA | 1971-1975 to 1992 | Civilian non-institutionalized men (44%) and women (56%) who were administered the Center for Epidemiological Studies-Depression Scale (CESD) at baseline (n=2,616). | Mean: 44.8 years. Range: 25-74. | Mean (SD): 14.9 years (5.1); range: 0-18.9 years | CHD, ICD-9 codes 410 to 414; home discharge reports and death certificates. | 357 | Age, race, education, income, marital status, hypertension, diabetes, cholesterol, physical activity, smoking, alcohol use, systolic and diastolic blood pressures, body mass index, depressive symptoms | Cox proportional hazards model. Whole sample: comparing subjects with high v. low levels of loneliness, HR: 1.53, 95% CI 1.07-2.21. Men: comparing subjects with high v. low levels of loneliness, HR: 0.88, 95% CI: 0.43-1.78. Women: comparing subjects with high v. low levels of loneliness, HR = 1.81, 95% CI: 1.20-2.94. |
|----------------|-------------------------------------------|-------------------|----------------------------------------------------------------------------------------------------------------------------------------------------------------------|---------------------------------|--------------------------------------------------|-----------------------------------------------------------------------------|-----|----------------------------------------------------------------------------------------------------------------------------------------------------------------------------------------------------------|--------------------------------------------------------------------------------------------------------------------------------------------------------------------------------------------------------------------------------------------------------------------------------------------------------------------------------|

#### Studies with a measure of social isolation

|                |                                                                                                          |              |                                                                                                                                                                                                                                                                 |     |                        |                                                                                                                                                                                                                        |     |                                   |                                                                                                                                                                                                                                                                                           |
|----------------|----------------------------------------------------------------------------------------------------------|--------------|-----------------------------------------------------------------------------------------------------------------------------------------------------------------------------------------------------------------------------------------------------------------|-----|------------------------|------------------------------------------------------------------------------------------------------------------------------------------------------------------------------------------------------------------------|-----|-----------------------------------|-------------------------------------------------------------------------------------------------------------------------------------------------------------------------------------------------------------------------------------------------------------------------------------------|
| Avendano, 2006 | Established Population for the Epidemiologic Studies of the Elderly Study (EPESE, New Haven sample), USA | 1982 to 1994 | Men and women living in New Haven, Connecticut, in 1982, in one of 3 housing strata: 1) public elderly housing that is age and income restricted, 2) private elderly housing that is age restricted, and 3) private community housing and apartments. (n=2,250) | 65+ | Study length: 12 years | Stroke, fatal or non-fatal; self-report of diagnosis, obituaries, surveillance of hospital admissions and annual interviews with next of kin. Records were matched to the National Death Index and death certificates. | 270 | Age, sex, race, education, income | Cox proportional hazards model. Aged 65-74: comparing people who scored 1 or less v. scoring higher on the social network index, HR: 2.03, 95% CI: 0.96-4.28. Aged 75+: comparing people who scored 1 or less v. scoring higher on the social network index, HR: 1.36, 95% CI: 0.48-3.81. |
|----------------|----------------------------------------------------------------------------------------------------------|--------------|-----------------------------------------------------------------------------------------------------------------------------------------------------------------------------------------------------------------------------------------------------------------|-----|------------------------|------------------------------------------------------------------------------------------------------------------------------------------------------------------------------------------------------------------------|-----|-----------------------------------|-------------------------------------------------------------------------------------------------------------------------------------------------------------------------------------------------------------------------------------------------------------------------------------------|

|                  |                                                                                    |              |                                                                                                                                                                                                                                                                                               |          |                       |                                                                                                                                                                                                                                             |     |                                                                                |                                                                                                                                                  |
|------------------|------------------------------------------------------------------------------------|--------------|-----------------------------------------------------------------------------------------------------------------------------------------------------------------------------------------------------------------------------------------------------------------------------------------------|----------|-----------------------|---------------------------------------------------------------------------------------------------------------------------------------------------------------------------------------------------------------------------------------------|-----|--------------------------------------------------------------------------------|--------------------------------------------------------------------------------------------------------------------------------------------------|
| Colantonio, 1992 | Established Population Studies of the Elderly Study (EPESE, New Haven sample), USA | 1982 to 1988 | Men (41%) and women (59%) aged 65 and over, living in New Haven, Connecticut, in 1982, in one of 3 housing strata: 1) public elderly housing that is age and income restricted, 2) private elderly housing that is age restricted, and 3) private community housing and apartments. (n=2,604) | Mean: 74 | Study length: 7 years | Stroke; hospital admission records, death certificates, Health Care Financing Administration data, self-reported strokes from annual contacts - verified against hospital records, using ICD-9 codes 431, 432.9, 433.0-434.9 and 436-437.1. | 167 | Age, sex, housing stratum, hypertension, diabetes, physical function, smoking. | Cox proportional hazards model. When the social network variable was added to the multivariate model, $X^2 = 0.15$ , $df=1$ , $p$ -value=0.6995. |
|------------------|------------------------------------------------------------------------------------|--------------|-----------------------------------------------------------------------------------------------------------------------------------------------------------------------------------------------------------------------------------------------------------------------------------------------|----------|-----------------------|---------------------------------------------------------------------------------------------------------------------------------------------------------------------------------------------------------------------------------------------|-----|--------------------------------------------------------------------------------|--------------------------------------------------------------------------------------------------------------------------------------------------|

---

|           |                                           |              |                                                            |                                |                        |                                                                                                                                                                                                                                                                                                                                         |                                                                                                                                                                                                                         |                                                                                                                                                                                                                                                                                                                                                                                                                                                                                                                                                                                                                                                                                                                                                                                                                                                              |                                                                                                                                                                                                                                                                                                                                                                                                                                                                                                                                       |
|-----------|-------------------------------------------|--------------|------------------------------------------------------------|--------------------------------|------------------------|-----------------------------------------------------------------------------------------------------------------------------------------------------------------------------------------------------------------------------------------------------------------------------------------------------------------------------------------|-------------------------------------------------------------------------------------------------------------------------------------------------------------------------------------------------------------------------|--------------------------------------------------------------------------------------------------------------------------------------------------------------------------------------------------------------------------------------------------------------------------------------------------------------------------------------------------------------------------------------------------------------------------------------------------------------------------------------------------------------------------------------------------------------------------------------------------------------------------------------------------------------------------------------------------------------------------------------------------------------------------------------------------------------------------------------------------------------|---------------------------------------------------------------------------------------------------------------------------------------------------------------------------------------------------------------------------------------------------------------------------------------------------------------------------------------------------------------------------------------------------------------------------------------------------------------------------------------------------------------------------------------|
| Eng, 2002 | Health Professionals Follow-up Study, USA | 1988 to 1998 | Male health professionals aged 40 to 75 in 1986 (n=28,369) | Mean: 55.2 years; range: 42-77 | Study length: 10 years | 4 outcomes: nonfatal MI, fatal MI, sudden cardiac death, combined measure of total CHD( i.e. all incident first events of nonfatal myocardial infarction, fatal coronary heart disease, sudden cardiac death, coronary artery bypass graft surgery, and angioplasty); medical records, death certificates, interviews with next of kin. | 1,816 incident cases of total coronary heart disease, including: 618 cases of nonfatal myocardial infarction, 142 cases of fatal coronary heart disease (excluding sudden cardiac death), and 97 sudden cardiac deaths. | Age (5-year categories), time period (1988–1990, 1990–1992, 1992–1994, 1994–1996, 1996–1998), occupation in 1986, smoking history (never, past, and current in categories of 1–14, 15–24, and ≥25 cigarettes/day), daily alcohol intake (0, 0.01–9.9, 10–19.9, 20–29.9, and ≥30 g/day), quintiles of body mass index, quintiles of physical activity, routine physical examination in the last 2 years (yes/no), ability to climb several flights of stairs (yes/no), ability to do heavy housework (yes/no), employment status (full time, part time, retired, disabled), history of hypertension, diabetes, high serum cholesterol, history of myocardial infarction in a parent aged <60 years (yes/no) in 1986, quintiles of energy-adjusted intakes of total fat, saturated fat, folate, and fiber, multivitamin and vitamin E supplement use (yes/no). | Cox proportional hazards model. Nonfatal myocardial infarction: comparing subjects with a low v. high level of social network, HR: 1.11, 95% CI: 0.80, 1.53. Fatal coronary heart disease: comparing subjects with a low v. high level of social network, HR: 1.82, 95% CI: 1.02, 3.23. Sudden cardiac death: comparing subjects with a low v. high level of social network, HR: 0.71, 95% CI: 0.28, 1.81. Total coronary heart disease: comparing subjects with a low v. high level of social network, HR: 0.99, 95% CI: 0.81, 1.20. |
|-----------|-------------------------------------------|--------------|------------------------------------------------------------|--------------------------------|------------------------|-----------------------------------------------------------------------------------------------------------------------------------------------------------------------------------------------------------------------------------------------------------------------------------------------------------------------------------------|-------------------------------------------------------------------------------------------------------------------------------------------------------------------------------------------------------------------------|--------------------------------------------------------------------------------------------------------------------------------------------------------------------------------------------------------------------------------------------------------------------------------------------------------------------------------------------------------------------------------------------------------------------------------------------------------------------------------------------------------------------------------------------------------------------------------------------------------------------------------------------------------------------------------------------------------------------------------------------------------------------------------------------------------------------------------------------------------------|---------------------------------------------------------------------------------------------------------------------------------------------------------------------------------------------------------------------------------------------------------------------------------------------------------------------------------------------------------------------------------------------------------------------------------------------------------------------------------------------------------------------------------------|

---

|               |                                                                                                                     |              |                                                                                              |              |                        |                                                                                                                                                                                                                       |                                                                                                                                                                                         |                                                                                                                                                                                                                                             |                                                                                                                                                                                                                                                                                                                                                                                                                                                                                                                                                                                                                                                                                                                                                                                                                                                                                                                                                                   |
|---------------|---------------------------------------------------------------------------------------------------------------------|--------------|----------------------------------------------------------------------------------------------|--------------|------------------------|-----------------------------------------------------------------------------------------------------------------------------------------------------------------------------------------------------------------------|-----------------------------------------------------------------------------------------------------------------------------------------------------------------------------------------|---------------------------------------------------------------------------------------------------------------------------------------------------------------------------------------------------------------------------------------------|-------------------------------------------------------------------------------------------------------------------------------------------------------------------------------------------------------------------------------------------------------------------------------------------------------------------------------------------------------------------------------------------------------------------------------------------------------------------------------------------------------------------------------------------------------------------------------------------------------------------------------------------------------------------------------------------------------------------------------------------------------------------------------------------------------------------------------------------------------------------------------------------------------------------------------------------------------------------|
| Kawachi, 1996 | Health Professionals Follow-up Study, USA                                                                           | 1988 to 1992 | Male health professionals aged 40 to 75 in 1986 (n=32,624)                                   | Range: 42-77 | Study length: 4 years  | 8 outcomes: total stroke, fatal stroke, nonfatal stroke, total CHD, fatal CHD, nonfatal CHD, sudden cardiac death, non-sudden cardiac death; medical records supplemented by correspondence and telephone interviews. | 104 incident cases of stroke (91 non-fatal, 13 fatal) and 403 cases of incident coronary heart disease (275 non-fatal myocardial infarction, 128 cases of fatal coronary heart disease) | Age, time-period, smoking status, history of hypertension, diabetes mellitus, hypercholesterolemia, diagnosis of angina pectoris, deciles of BMI, parental history of MI before age 60, daily alcohol intake, tertiles of physical activity | Cox proportional hazards model. Total stroke: comparing subjects with a low v. high level of social network, HR: 2.02, 95% CI: 1.00, 4.08. Fatal stroke: age-adjusted model only, comparing subjects with a low v. high level of social network, HR: 3.64, 95% CI: 0.78, 16.9. Nonfatal stroke: comparing subjects with a low v. high level of social network, HR: 1.86, 95% CI: 0.85, 4.06. Total CHD: comparing subjects with a low v. high level of social network, HR: 1.14, 95% CI: 0.74, 1.73. Fatal CHD: comparing subjects with a low v. high level of social network, HR: 1.42, 95% CI: 0.72, 2.81. Nonfatal CHD: comparing subjects with a low v. high level of social network, HR: 1.00, 95% CI: 0.58, 1.71. Sudden cardiac death: comparing subjects with a low v. high level of social network, HR: 0.68, 95% CI: 0.16, 2.96. Non-sudden cardiac death: comparing subjects with a low v. high level of social network, HR: 1.89, 95% CI: 0.87, 4.13. |
| Gafarov, 2013 | Multinational Monitoring of Trends and Determinants in Cardiovascular Disease (MONICA) - Psychosocial Study, Russia | 1994 to 2010 | Women aged 25-64 in 1994 living in one of the Novosibirsk districts, Western Siberia (n=870) | Range: 25-64 | Study length: 16 years | 2 outcomes: MI, stroke; register, medical records and death certificates.                                                                                                                                             | MI: 15; stroke: 35                                                                                                                                                                      | None reported                                                                                                                                                                                                                               | Cox proportional hazards model. Across the whole sample, MI: comparing subjects with low v. higher levels of social network, HR: 2.92, 95% CI: 1.040-8.208. Stroke: comparing subjects with low v. higher levels of social network, HR: 2.72, 95% CI: 1.094-6.763; p<0.05. In the 55-64 age group, MI: comparing subjects with low v. higher levels of social network, HR: 5.9, 95% CI: 1.534-22.947. Focus on close contacts: MI: comparing subjects with low v. higher levels of close social network, HR: 4.9, 95% CI: 1.108-21.762. Stroke: comparing subjects with low v. higher levels of social network, HR: 4.1, 95% CI: 1.193-14.055.                                                                                                                                                                                                                                                                                                                    |

|                 |                                                                                                       |                   |                                                                                                                                                                                    |                        |                                         |                                                                                                                                                                                                                                                        |                                              |                                                                                                                                                                                                                                                                                                                                                    |                                                                                                                                                                                                                                                  |
|-----------------|-------------------------------------------------------------------------------------------------------|-------------------|------------------------------------------------------------------------------------------------------------------------------------------------------------------------------------|------------------------|-----------------------------------------|--------------------------------------------------------------------------------------------------------------------------------------------------------------------------------------------------------------------------------------------------------|----------------------------------------------|----------------------------------------------------------------------------------------------------------------------------------------------------------------------------------------------------------------------------------------------------------------------------------------------------------------------------------------------------|--------------------------------------------------------------------------------------------------------------------------------------------------------------------------------------------------------------------------------------------------|
| Sykes, 2002     | Prospective Epidemiological Study of Myocardial Infarction (PRIME) Study, Northern Ireland and France | 1991 to 1994      | Men aged 50 to 59 in 1991-1994 and initially free from any cardiovascular disease (n=9,758)                                                                                        | Range: 50-59           | Study length: 5 years                   | 2 outcomes: 'hard CHD' (i.e. subjects who had died from CHD or had at least one non-fatal MI), total AP (i.e. angina pectoris or unstable angina); postal questionnaire followed-up by hospital or general practitioner notes, and death certificates. | Hard CHD: 163; total AP: 154.                | Hostility, competitiveness, depression, impatience                                                                                                                                                                                                                                                                                                 | Logistic regression. Hard CHD, full model: $X^2 = 7.389$ , $df = 5$ , p-value: not significant. Total AP, full model: $X^2 = 16.242$ , $df = 5$ , $p = 0.006$ . The authors report that only depression and hostility contributed to the effect. |
| Nagayoshi, 2014 | Atherosclerosis Risk in Communities Study, USA                                                        | 1990-1992 to 2010 | Men (44%) and women (56%) aged 45-64 in 1987-1989, living in one of 4 communities: Washington County, MD; suburban Minneapolis, MN; Forsyth County, NC; and Jackson, MS (n=13,686) | Mean: 57; range: 46-69 | Median: 18.6 years; maximum: 20.9 years | 2 outcomes: stroke, and ischemic stroke only; phone calls, surveillance of hospital discharges, death certificates - checked against medical records.                                                                                                  | 905 incident strokes, of which ischemic: 804 | Age, sex and race, socioeconomic status (education attainment, income, occupation), marital status, behavioural risk factors (smoking status, alcohol drinking, physical activity), major stroke risk factors (hypertension, diabetes mellitus, low-density lipoprotein, high-density lipoprotein, lipid-lowering medication use, body mass index) | Cox proportional hazards model. Stroke: comparing subjects with small v. larger network, HR: 1.44, 95% CI: 1.02-2.04. Ischemic stroke only: comparing subjects with small v. large social networks, HR: 1.41, 95% CI: 0.98-2.03.                 |

|                  |                                                |                     |                                                                                                                                                                                                                  |                                                                    |                        |                                                                                                                                                                                                                                                                   |     |                                                                                                                                  |                                                                                                                                                                                          |
|------------------|------------------------------------------------|---------------------|------------------------------------------------------------------------------------------------------------------------------------------------------------------------------------------------------------------|--------------------------------------------------------------------|------------------------|-------------------------------------------------------------------------------------------------------------------------------------------------------------------------------------------------------------------------------------------------------------------|-----|----------------------------------------------------------------------------------------------------------------------------------|------------------------------------------------------------------------------------------------------------------------------------------------------------------------------------------|
| Player, 2007     | Atherosclerosis Risk in Communities Study, USA | 1990-2 to 1996-1998 | Men (48.3%) and women (51.7%) aged 45-64 in 1987-1989, living in one of 4 US communities and with blood pressures in the prehypertension range (120 to 139 mm Hg systolic or 80 to 89 mm Hg diastolic) (n=2,334) | Range: 48-67; 50.4% sample were aged 48-57, 49.5% aged 58-67 years | Range: 4-8 years       | Progression from prehypertension to CHD or CHD death; hospital discharge summaries, death certificates, supplemented with information from interviews with next of kin and coroners' or medical examiners' reports for out-of-hospital causes and dates of death. | 262 | None                                                                                                                             | $\chi^2$ analysis. P-value associated with $\chi^2$ in bivariate analysis re. social networks = 0.220                                                                                    |
| Rosengren, 2004  | Men born in 1933 Study, Sweden                 | 1983 to 1998        | Men born in 1933 in Gothenborg (n=741)                                                                                                                                                                           | 49-50                                                              | Study length: 15 years | CHD (MI; coronary revascularization; acute hospitalization with discharge diagnosis of angina); hospital registers.                                                                                                                                               | 92  | Smoking, physical activity, serum cholesterol, serum triglyceride, systolic blood pressure, BMI, diabetes, family history of CHD | Cox proportional hazards modelling. Comparing subjects with high v. low levels of integration, HR = 0.45, 95% CI: 0.24-0.84                                                              |
| Orth-Gomer, 1993 | Men born in 1933 Study, Sweden                 | 1983 to 1988-9      | Men born in 1933 in Gothenborg (n=736)                                                                                                                                                                           | 49-50                                                              | Study length: 6 years  | CHD, including fatal and non fatal MI and sudden and non sudden coronary death; hospital records, death certificates, national cause-specific death register.                                                                                                     | 25  | Serum cholesterol, BMI, smoking, treatment for hypertension, diabetes, physical activity                                         | Multiple logistic regression. Comparing subjects in the lower v. upper quartiles of social integration, OR = 3.8, 95% CI: 1.1-13.9; regression coefficient = -0.656, SE = 0.327, p=0.04. |

|             |                                                                          |                   |                                                                                                                            |                                           |                                              |                                                                                                                                        |                                                                            |                                                                                                                                                                                                                                                                                                                                         |                                                                                                                                                                                                                                                                                                                                                                                                                                                                                                                                                                                                                                                                                                                                                                                                                                                                                                                                                                                                                                                                                                                                                                         |
|-------------|--------------------------------------------------------------------------|-------------------|----------------------------------------------------------------------------------------------------------------------------|-------------------------------------------|----------------------------------------------|----------------------------------------------------------------------------------------------------------------------------------------|----------------------------------------------------------------------------|-----------------------------------------------------------------------------------------------------------------------------------------------------------------------------------------------------------------------------------------------------------------------------------------------------------------------------------------|-------------------------------------------------------------------------------------------------------------------------------------------------------------------------------------------------------------------------------------------------------------------------------------------------------------------------------------------------------------------------------------------------------------------------------------------------------------------------------------------------------------------------------------------------------------------------------------------------------------------------------------------------------------------------------------------------------------------------------------------------------------------------------------------------------------------------------------------------------------------------------------------------------------------------------------------------------------------------------------------------------------------------------------------------------------------------------------------------------------------------------------------------------------------------|
| Kuper, 2006 | Women's Lifestyle and Health Cohort Study, Sweden                        | 1991-1992 to 2002 | Women aged 30–50 residing in the Uppsala health care region (n=47,713)                                                     | Mean (SD): 40.3 years (5.8); range: 30-50 | Mean: 135 months, i.e. 11 years and 3 months | Fatal and non-fatal MI; national hospital discharge and death registers.                                                               | 210                                                                        | Age, cigarette smoking, exercise, alcohol consumption, weight, height, diabetes, high blood pressure                                                                                                                                                                                                                                    | Cox proportional hazards modelling. Comparing subjects with the highest v. lowest social support, HR = 1.3, 95% CI: 0.9-1.8                                                                                                                                                                                                                                                                                                                                                                                                                                                                                                                                                                                                                                                                                                                                                                                                                                                                                                                                                                                                                                             |
| Ikeda, 2008 | Second cohort of the Public Health Center-Based Prospective Study, Japan | 1993-1994 to 2004 | Men (47.5%) and women (52.5%) aged 40 to 69 years in 1993-1994 and living in one of 13 administrative districts (n=44,152) | Mean: 53.6; range: 40-69                  | Mean: 10.7 years                             | 4 outcomes: nonfatal MI, fatal MI, nonfatal stroke, fatal stroke; medical records, letter and telephone follow-up, death certificates. | Nonfatal MI: 301; fatal MI: 191, nonfatal stroke: 1,057; fatal stroke: 327 | Age (years), smoking status (never, former, or current), ethanol intake (nondrinkers and former drinkers, less than weekly, <150 g/wk, or ≥150 g/wk), body mass index (kg/m <sup>2</sup> in quartiles), leisure time sports activity (<1 day/mo, 1 to 3 days/mo, or ≥1 cday/wk), perceived stress (less, moderate, or high), occupation | Cox proportional hazards model. Nonfatal MI: comparing subjects with low v. very high levels of support, HR = 0.90, 95% CI: 0.60-1.35; comparing men with low v. very high levels of support, HR = 1.06, 95% CI: 0.68-1.67; comparing women with low v. very high levels of support, HR = 0.55, 95% CI: 0.19-1.57. Fatal MI: comparing subjects with low v. very high levels of support, HR = 1.00, 95% CI: 0.61-1.63; comparing men with low v. very high levels of support, HR = 1.12, 95% CI: 0.65-1.94; comparing women with low v. very high levels of support, HR = 0.58, 95% CI: 0.17-1.99. Nonfatal stroke: comparing subjects with low v. very high level of support, HR = 1.11, 95% CI: 0.89-1.37; comparing men with low v. very high level of support, HR = 1.09, 95% CI: 0.84-1.43; comparing women with low v. very high level of support, HR = 1.22, 95% CI: 0.85-1.74. Fatal stroke: comparing subjects with low v. very high level of support, HR = 1.45, 95% CI: 1.00-2.10; comparing men with low v. very high level of support, HR = 1.59, 95% CI: 1.01-2.51; comparing women with low v. very high level of support, HR = 1.25, 95% CI: 0.63-2.46. |
| Reed, 1984  | Honolulu Heart Program Study, USA                                        | 1971 to 1979      | Men of Japanese ancestry born between 1900 and 1919 and living in Oahu, Hawaii, in 1965 (n=4,251)                          | Range: 51-72                              | 1971 to 1979                                 | 2 outcomes: CHD (MI and CHD deaths), stroke; hospital and medical records, postmortem data.                                            | CHD: 155; stroke: 98                                                       | Age                                                                                                                                                                                                                                                                                                                                     | Multiple logistic regression analysis. CHD: comparing subjects with low v. high networks, p-value ≤0.05. Stroke: comparing subjects with low v. high networks, p-value >0.05.                                                                                                                                                                                                                                                                                                                                                                                                                                                                                                                                                                                                                                                                                                                                                                                                                                                                                                                                                                                           |



|                |                                                        |                    |                                                                                                                                                 |                                                                       |                                     |                                                                                                                 |                                                           |                                                                                                                                                                                                                                |                                                                                                                                                                                                                                                                                      |
|----------------|--------------------------------------------------------|--------------------|-------------------------------------------------------------------------------------------------------------------------------------------------|-----------------------------------------------------------------------|-------------------------------------|-----------------------------------------------------------------------------------------------------------------|-----------------------------------------------------------|--------------------------------------------------------------------------------------------------------------------------------------------------------------------------------------------------------------------------------|--------------------------------------------------------------------------------------------------------------------------------------------------------------------------------------------------------------------------------------------------------------------------------------|
| Reed, 1983     | Honolulu Heart Program Study, USA                      | 1971 to 1979       | Men of Japanese ancestry born between 1900 and 1919 and living in Oahu, Hawaii, in 1965 (n=4,389)                                               | Range: 51-72                                                          | 1971 to 1979                        | 4 outcomes: nonfatal MI, fatal MI, angina, and total CHD (MI+angina); hospital discharge and mortality records. | Total CHD: 218; nonfatal MI: 95; fatal MI: 76; angina: 47 | Age, systolic blood pressure, serum cholesterol, serum glucose, serum uric acid, forced vital capacity, BMI, physical activity index, cigarettes/day, alcohol consumption, complex carbohydrate, socioeconomic status          | Multiple logistic regression: coefficients associated with social network scores, CHD: beta = -0.0836, p-value > 0.5 nonfatal MI: beta = -0.0576, p-value > 0.5 fatal MI: beta = -0.0505, p-value > 0.5 angina: beta = -0.1348, p-value > 0.5                                        |
| Rutledge, 2008 | Women's Ischemia Syndrome Evaluation (WISE) Study, USA | 1996 to 2005       | Women referred for a coronary angiogram to evaluate suspected myocardial ischemia (n=629)                                                       | Median (SD): 59.6 (11.6); aged 18+                                    | Mean: 5.9 years                     | Stroke; inquiry by nurse or physician, death certificates.                                                      | 32                                                        | Age, education history, ethnicity, Beck Depression Inventory scores, diabetes, smoking, dyslipidemia and hypertension histories, waist-circumference, coronary artery disease severity score                                   | Cox proportional hazards modelling. Comparing subjects with low v. high social network index scores, HR= 2.7, 95% CI: 1.1-6.5.                                                                                                                                                       |
| Vogt, 1992     | Health maintenance organization, USA                   | 1970-1971 to 1986  | Men (46.1%) and women (53.9%) enrolled for at least two years with a managed care health maintenance organization in Portland, Oregon (n=2,396) | 15.5% aged 18-29; 30.25% aged 30-44; 36.8% aged 45-64; 17.5% aged 65+ | Length of study: 15 years           | 2 outcomes: CHD, stroke; medical care and mortality records.                                                    | NR                                                        | Age, sex, socioeconomic status, current and former smoking, subjective health status                                                                                                                                           | Cox proportional hazards modelling. CHD: Comparing subjects in the low v. high tertiles of social network size, HR = 1.2, 95% CI: 0.9-1.6, p-value = 0.26. Stroke: Comparing subjects in the low v. high tertiles of social network size, HR = 0.9, 95% CI: 0.6-1.3, p-value = 0.58. |
| Barefoot, 2005 | Copenhagen City Heart Study, Denmark                   | 1991-1994 to 1997. | Men (44.3%) and women (55.7%) living in Copenhagen (n=9,460)                                                                                    | Mean: 57.5; range: 21-93                                              | Mean: 5.7 years; maximum: 7.2 years | CHD; national health and hospital discharge registers.                                                          | 427                                                       | Age, gender, education, BMI, family history of coronary disease, systolic blood pressure, glucose, high density lipoprotein cholesterol, total cholesterol, smoking, alcohol consumption, physical activity, self-rated health | Cox proportional hazards modelling. Comparing people with 6-7 contacts to 0-1 contacts, HR = 0.67, 95% CI: 0.33-1.39. Comparing people with 5 intimate contacts to no contact, HR = 0.39, 95% CI: 0.14-1.06.                                                                         |

|               |                                |                   |                                                                                                                                                           |       |                                                       |                                       |    |                                                                                                                                                                                                    |                                                                                                                                                             |
|---------------|--------------------------------|-------------------|-----------------------------------------------------------------------------------------------------------------------------------------------------------|-------|-------------------------------------------------------|---------------------------------------|----|----------------------------------------------------------------------------------------------------------------------------------------------------------------------------------------------------|-------------------------------------------------------------------------------------------------------------------------------------------------------------|
| Hedblad, 1992 | Men Born in 1914 Study, Sweden | 1982-1983 to 1987 | Men born in 1914 and living in Malmö in 1982/3 who participated in a long-term ECG recording and had at least one episode of ST segment depression (n=98) | 67-68 | Mean: 53.1 months i.e. just over 4 years and 5 months | CHD; infarct and mortality registers. | 17 | Previous IHD, hypertension, hyperlipidaemia, obesity, high alcohol consumption, current smoking and low to moderate physical activity, social support and social influence indices, marital status | Multiple logistic regression. Comparing subjects with low v. high contact frequency, RR = 1.2, 95% CI: 0.3-4.9; regression coefficient = 0.193, SE = 0.713. |
|---------------|--------------------------------|-------------------|-----------------------------------------------------------------------------------------------------------------------------------------------------------|-------|-------------------------------------------------------|---------------------------------------|----|----------------------------------------------------------------------------------------------------------------------------------------------------------------------------------------------------|-------------------------------------------------------------------------------------------------------------------------------------------------------------|

---

**Studies with a measure combining loneliness and social isolation**

---

|              |                                                            |              |                                                                      |              |                       |                      |     |      |                                                                                                                                   |
|--------------|------------------------------------------------------------|--------------|----------------------------------------------------------------------|--------------|-----------------------|----------------------|-----|------|-----------------------------------------------------------------------------------------------------------------------------------|
| Strodl, 2003 | Australian Longitudinal Study on Women's Health, Australia | 1993 to 1996 | Women aged 70-75 identified via national medicare database (n=6,994) | Range: 70-75 | Study length: 3 years | CHD; self-report.    | 503 | None | Logistic regression. Comparing subjects with low to fair v. very high social support, OR = 1.41, 95% CI 1.11-1.79, p-value ≤ .01. |
| Strodl, 2008 | Australian Longitudinal Study on Women's Health, Australia | 1993 to 1996 | Women aged 70-75 identified via national medicare database (n=8,907) | Range: 70-75 | Study length: 3 years | Stroke; self-report. | 174 | None | Logistic regression. Comparing subjects with low to fair v. very high social support, OR = 0.88, 95% CI: 0.62-1.25.               |

---
