# Supplementary material for: Loneliness and social isolation as risk factors for coronary heart disease and stroke: systematic review and meta-analysis of longitudinal observational studies
Source: PubMed Central journal article supplement (PMC4941172; doi:10.1136/heartjnl-2015-308790), 2016-04-18
Supplement: heartjnl-2015-308790supp_appendix3.pdf [file heartjnl-2015-308790supp_appendix3.pdf]

### Appendix 3 Criteria for assessment of risk of bias

| Domain                                | Lower risk of bias                                                                                                                                                                                                                                                                                               | Higher risk of bias                                                                                                                                                                                | Unclear risk of bias     |
|---------------------------------------|------------------------------------------------------------------------------------------------------------------------------------------------------------------------------------------------------------------------------------------------------------------------------------------------------------------|----------------------------------------------------------------------------------------------------------------------------------------------------------------------------------------------------|--------------------------|
| <b>Differential loss to follow-up</b> | Subjects lost to follow-up did not significantly differ from the rest of the sample.                                                                                                                                                                                                                             | There were significant differences in characteristics likely to increase risk of bias between the baseline data reported for the whole sample and the baseline data of subjects lost to follow-up. | No information available |
| <b>Measurement error - exposure</b>   | Available data suggest that the tool used to measure loneliness and/or social isolation was comparatively valid and reliable.                                                                                                                                                                                    | Loneliness and/or social isolation were assessed using a tool that was of limited validity and/or reliability.                                                                                     | No information available |
| <b>Measurement error - outcome</b>    | Measure based on information from medical records, registers and/or death certificates.                                                                                                                                                                                                                          | Reliance on self-report of diagnosis.                                                                                                                                                              | No information available |
| <b>Detection bias</b>                 | Assessors were blinded to exposure.                                                                                                                                                                                                                                                                              | Assessors were not blinded to exposure.                                                                                                                                                            | No information available |
| <b>Confounding</b>                    | Studies controlled for CVD risk factors correlated with loneliness/social isolation, i.e. gender (in mixed samples), age, socio-economic status. Note that measures relating to health (e.g. diabetes, health-behaviours) are not included in this list because of them potentially being on the causal pathway. | Studies did not control for age, gender and socio-economic status.                                                                                                                                 | No information available |
