# Supplementary material for: Loneliness and social isolation as risk factors for coronary heart disease and stroke: systematic review and meta-analysis of longitudinal observational studies
Source: PubMed Central journal article supplement (PMC4941172; doi:10.1136/heartjnl-2015-308790), 2016-04-18

## Appendix 5 Subgroup analyses of CHD studies

### a) According to social relationship domain (loneliness v. social isolation)

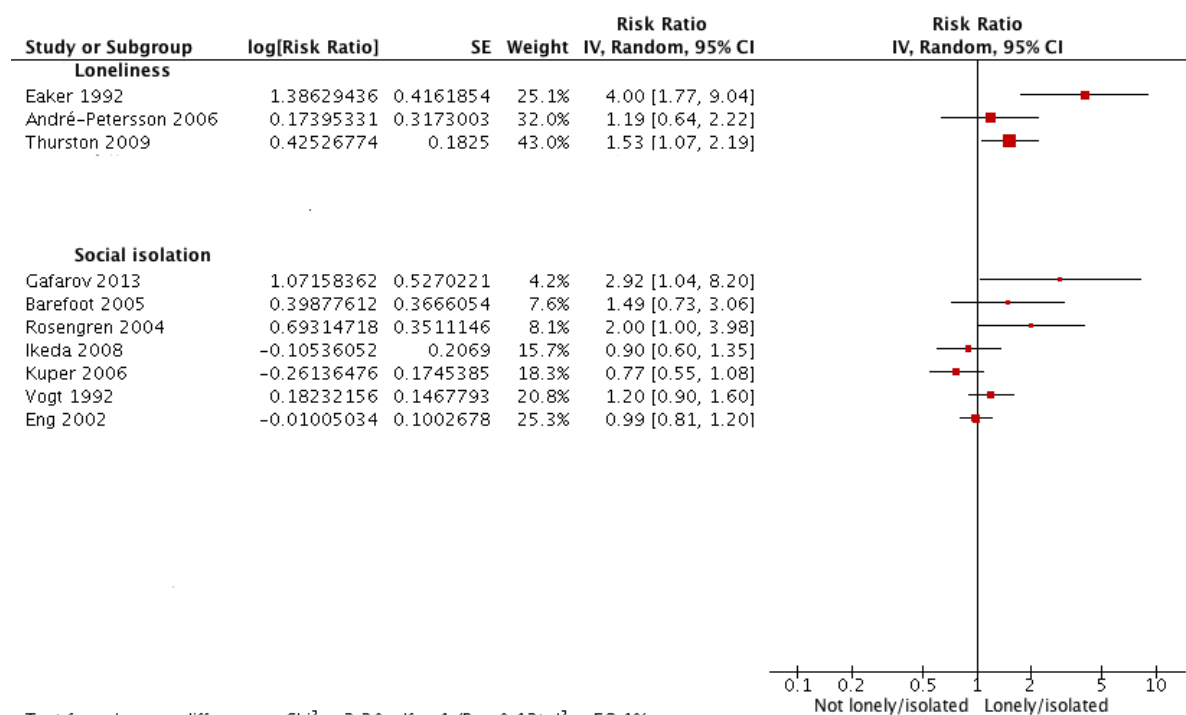

### b) According to gender

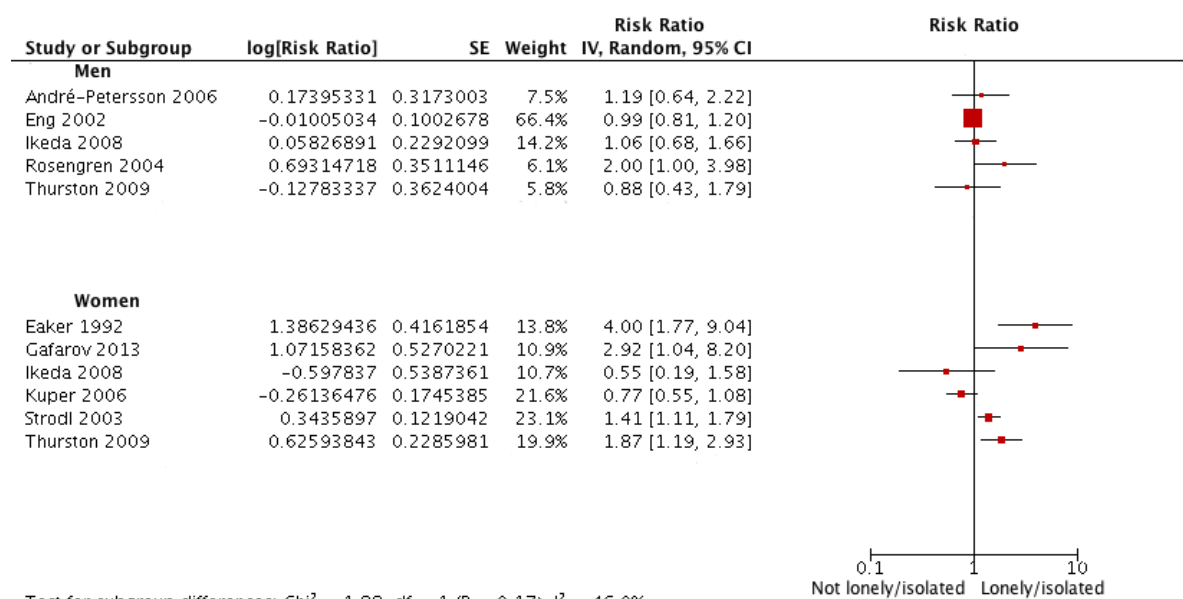

c) According to risk of confounding

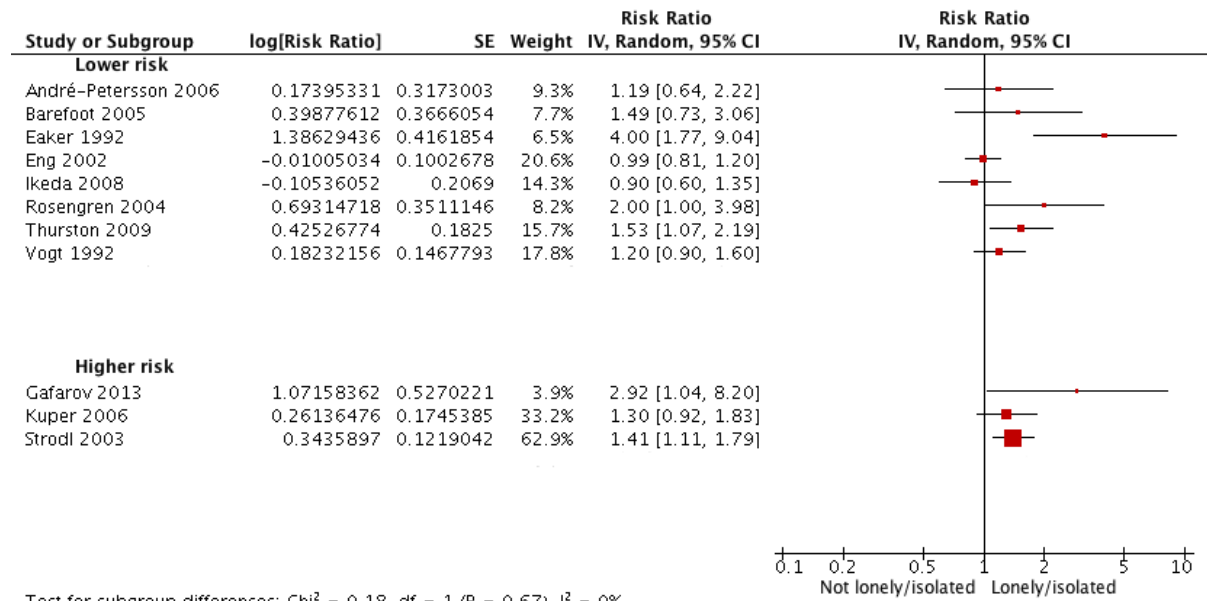

d) According to risk of bias due to measurement error – exposure

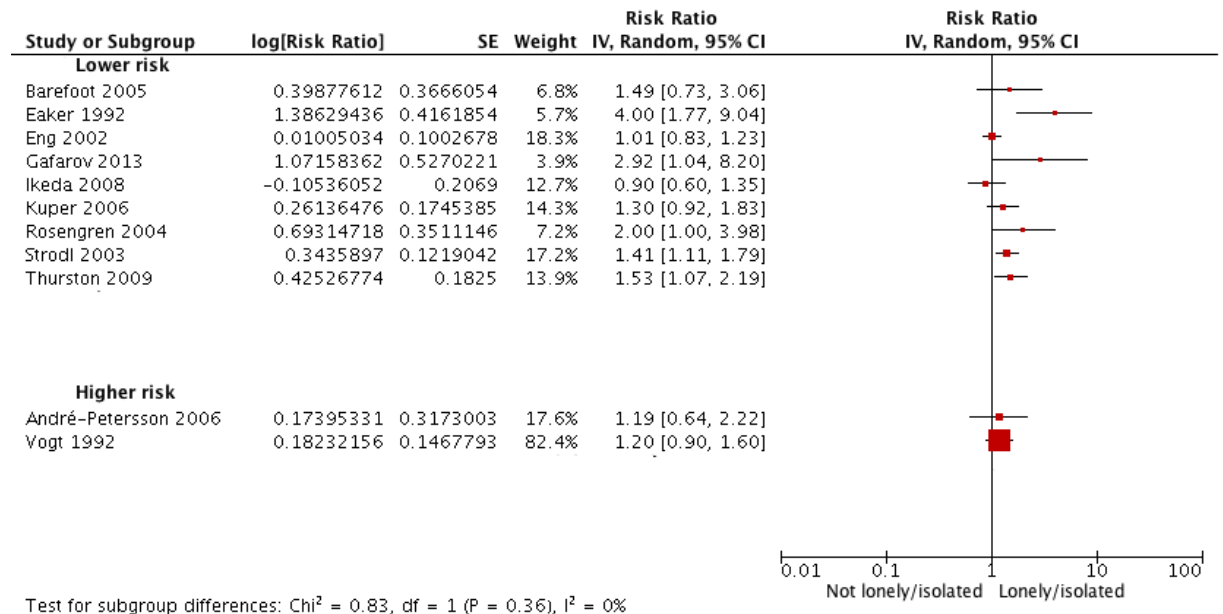

Supplement: heartjnl-2015-308790supp_appendix5.pdf [file heartjnl-2015-308790supp_appendix5.pdf]
