# Supplementary material for: Loneliness and social isolation as risk factors for coronary heart disease and stroke: systematic review and meta-analysis of longitudinal observational studies
Source: PubMed Central journal article supplement (PMC4941172; doi:10.1136/heartjnl-2015-308790), 2016-04-18

## Appendix 6 Subgroup analysis of stroke studies

### a) According to risk of confounding

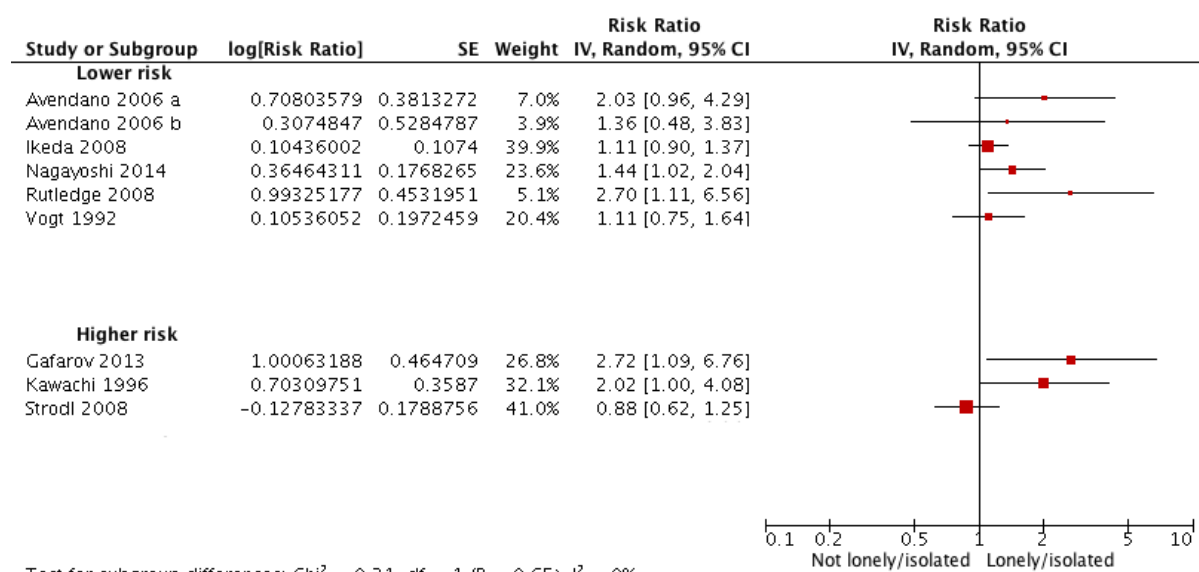

### b) According to risk of bias due to measurement error – outcome

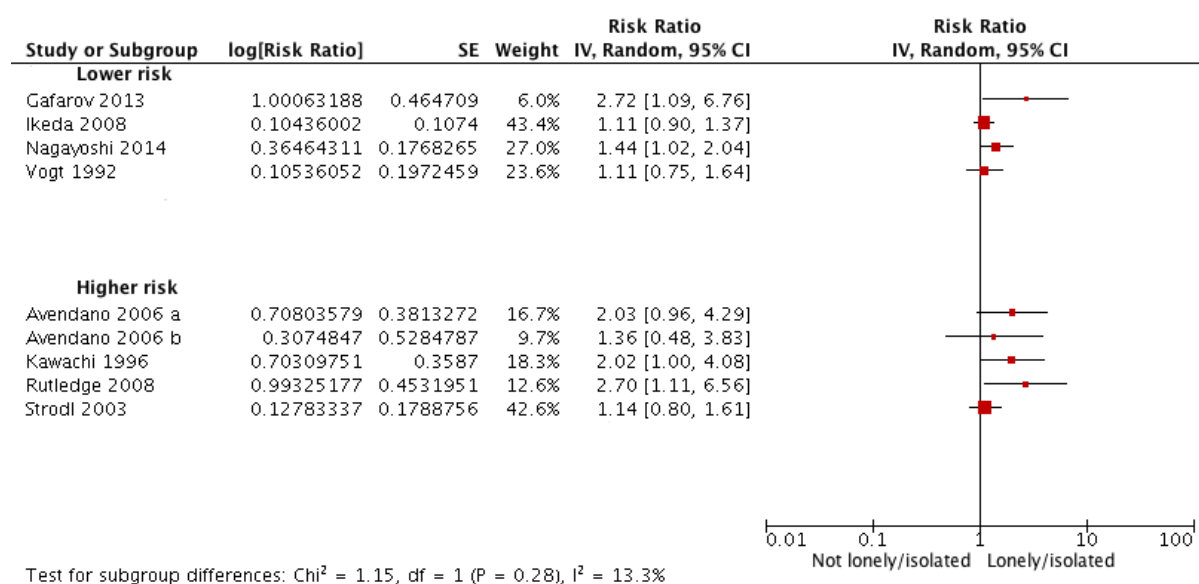

Supplement: heartjnl-2015-308790supp_appendix6.pdf [file heartjnl-2015-308790supp_appendix6.pdf]
